# Supplementary material for: Ginsenoside Rg1 activates brown adipose tissue to counteract obesity in high-fat diet-fed mice by regulating gut microbes and bile acid composition
Source: Royal Society of Chemistry journal article supplement (doi:10.1039/d2fo03142f), 2023-01-01
Supplement: d2fo03142f2.xlsx [file d2fo03142f2.xlsx]

## Sheet: Sheet1
Group	Ear Tag	food intake	physical activity	energy intake	faecal volume	faecal energy	no absorbed energy	absorbed energy
HFD	B146	2.45	6027	56.5836	0.662	19895	6.58524	49.9983		Feed energy	24141	23095.3
	B123	2.2	7842	50.8097	0.7255	19313	7.00579	43.8039			23522
	B148	2.75	5788	63.5122	0.9469	19124	9.05426	54.4579			21623
	B127	2.35	8610	54.274	0.6773	19362	6.55694	47.7171
	B139	2.25	4579	51.9645	0.8051	18354	7.3884	44.5761
	B131	2.45	4980	56.5836	0.8341	17446	7.27585	49.3077
	B147	2.55	5604	58.8931	0.7211	18409	6.63736	52.2557
	B137	2.25	5286	51.9645	0.6135	20149	6.18071	45.7838
	B125	2.25	6986	51.9645	0.6275	18630	5.84516	46.1193
HFD+Rg1	B121	2.45	4655	56.5836	0.7896	18065	7.13206	49.4515
	B132	2.85	4366	65.8217	0.8486	17825	7.56315	58.2585
	B133	2.7	6607	62.3574	0.7165	18487	6.62297	55.7344
	B143	2.35	5603	54.274	0.8663	17167	7.43589	46.8381
	B130	2.65	6434	61.2026	0.8264	18230	7.53264	53.67
	B134	2.6	5400	60.0479	0.8025	18426	7.39343	52.6544
	B140	2.6	5708	60.0479	0.8755	17337	7.58927	52.4586
	B142	3.1	6323	71.5955	0.9238	20900	9.65371	61.9418
	B135	2.9	6659	66.9765	1.0747	17601	9.4579	57.5186
	B149	3.1	10614	71.5955	0.8693	21243	9.23327	62.3623
AVERAGE	HFD	2.38889	6189.11	55.1722	0.734778	18964.7	6.94775	48.2244
	HFD+Rg1	2.73	6236.9	63.0503	0.85932	18528.1	7.96143	55.0888
SD	HFD	0.179892	1352.19	4.15466	0.108913	842.08	0.930531	3.58686
	HFD+Rg1	0.254078	1729	5.86801	0.0946584	1411.74	1.06875	5.06562
TTEST	HFD/HFD+Rg1	0.00387948	0.947722	0.00387948	0.0162397	0.431232	0.0425148	0.00362696
