# Supplementary material for: Ginsenoside Rg1 activates brown adipose tissue to counteract obesity in high-fat diet-fed mice by regulating gut microbes and bile acid composition
Source: Royal Society of Chemistry journal article supplement (doi:10.1039/d2fo03142f), 2023-01-01
Supplement: d2fo03142f3.xlsx [file d2fo03142f3.xlsx]

## Sheet: Figure.S1F
Gray value data of WB
		UCP1	β-actin	UCP1/β-actin		Fold change	AVERAGE	TTEST	SD
HFD	1	10933	19173.4	0.570214	0.576645	0.988847	1	0.0493373	0.553781
	2	4514.57	17325.5	0.260574		0.451879
	3	12654.8	14074.2	0.899148		1.55927
HFD+Rg1	4	16915.4	15458.5	1.09425	1.19377	1.89761	2.07019		0.367272
	5	25813.4	17963.6	1.43698		2.49197
	6	17661.7	16819.6	1.05007		1.82099
		ATP5A	β-actin
HFD	1	19195.9	19173.4	1.00117	0.905336	1.10586	1	0.739512	0.197428
	2	12112.5	17325.5	0.699118		0.772219
	3	14295.4	14074.2	1.01572		1.12193
HFD+Rg1	4	13932.7	15458.5	0.901296	0.94292	0.995538	1.04151		0.0414028
	5	17127.5	17963.6	0.953456		1.05315
	6	16382.4	16819.6	0.974008		1.07585
		UQCRC2	β-actin
HFD	1	22534	19173.4	1.17527	1.31122	0.896321	1	0.307972	0.162894
	2	20807.5	17325.5	1.20098		0.915926
	3	21919.1	14074.2	1.5574		1.18775
HFD+Rg1	4	22071.2	15458.5	1.42778	1.46027	1.08889	1.11367		0.0438326
	5	25623.3	17963.6	1.4264		1.08784
	6	25677.2	16819.6	1.52663		1.16428
		SDHB	β-actin
HFD	1	14044	19173.4	0.732473	0.901081	0.812882	1	0.083177	0.225344
	2	14627.6	17325.5	0.844285		0.936969
	3	15854.3	14074.2	1.12648		1.25015
HFD+Rg1	4	19356.1	15458.5	1.25213	1.22981	1.38959	1.36481		0.157689
	5	19362.5	17963.6	1.07787		1.1962
	6	22864.7	16819.6	1.35941		1.50864
