# Supplementary material for: Ginsenoside Rg1 activates brown adipose tissue to counteract obesity in high-fat diet-fed mice by regulating gut microbes and bile acid composition
Source: Royal Society of Chemistry journal article supplement (doi:10.1039/d2fo03142f), 2023-01-01
Supplement: d2fo03142f4.xlsx [file d2fo03142f4.xlsx]

## Sheet: Sheet1
Group	Ear Tag	food intake	physical activity	energy intake	faecal volume	faecal energy	no absorbed energy	absorbed energy
HFD+ABX	B084	2.6	7712	60.0478	1.0442	16661	8.69871	51.3491		Feed energy	24141	23095.3
	B094	2.35	5838	54.274	0.8415	16630	6.99707	47.2769			23522
	B099	3	5093	69.2859	1.0576	17697	9.35817	59.9277			21623
	B100	2	8903	46.1906	0.9496	16237	7.70933	38.4813
	B088	2.5	5693	57.7383	0.9983	16775	8.37324	49.365
	B087	2.15	5824	49.6549	0.899	15472	6.95466	42.7002
	B085	2.65	9281	61.2025	0.9301	17175	7.98723	53.2153
	B093	2.25	8686	51.9644	0.7713	16757	6.46234	45.5021
	B217	2.75	9311	63.5121	0.9678	16611	8.03806	55.474
	B218	2.35	7991	54.274	0.8204	17147	7.0337	47.2403
HFD+ABX+Rg1	B091	2.25	10339	51.9644	0.7254	16546	6.00123	45.9632
	B092	1.95	10031	45.0358	0.7012	15981	5.60294	39.4329
	B095	2.55	7485	58.893	0.7611	16820	6.40085	52.4922
	B090	1.9	9707	43.8811	0.7471	16456	6.14714	37.7339
	B096	2.65	6110	61.2025	0.9445	17087	8.06934	53.1332
	B086	2.45	5909	56.5835	0.8323	16801	6.99174	49.5917
	B301	3	7492	69.2859	0.8589	15687	6.73678	62.5491
	B097	2.3	8643	53.1192	0.7519	16812	6.32047	46.7987
	B083	2.4	7178	55.4287	0.891	16301	7.2621	48.1666
	B089	2.9	9052	66.9764	1.1741	17398	10.2135	56.7629
AVERAGE	HFD+ABX	2.46	7433.2	56.8144	0.92798	16716.2	7.76125	49.0532
	HFD+ABX+Rg1	2.435	8194.6	56.2371	0.83875	16588.9	6.97461	49.2624
SD	HFD+ABX	0.299815	1656.58	6.92431	0.0953075	592.77	0.905843	6.26589
	HFD+ABX+Rg1	0.360594	1591.45	8.32802	0.141641	509.495	1.33745	7.49813
T TEST	HFD+ABX/HFD+ABX+Rg1	0.868005	0.308444	0.868005	0.115705	0.612808	0.140962	0.946754
