# Supplementary material for: Ginsenoside Rg1 activates brown adipose tissue to counteract obesity in high-fat diet-fed mice by regulating gut microbes and bile acid composition
Source: Royal Society of Chemistry journal article supplement (doi:10.1039/d2fo03142f), 2023-01-01
Supplement: d2fo03142f5.xlsx [file d2fo03142f5.xlsx]

## Sheet: Sheet1
Gray value data of WB
		UCP1	β-actin	UCP1/β-actin		Fold change	AVERAGE	TTEST	SD
HFD+ABX	1	23553.9	20634.4	1.14149	0.853625	1.33722	1	0.561028	0.295455
	2	16066.7	23927.3	0.671478		0.78662
	3	20181.6	26984	0.747909		0.876157
HFD+ABX+Rg1	4	21751.2	25425.3	0.855494	0.753396	1.00219	0.882585		0.126004
	5	16373.7	25540	0.6411		0.751033
	6	20784.3	27219	0.763594		0.894532
		ATP5A	β-actin
HFD+ABX	1	11097.5	20634.4	0.537814	0.527806	1.01896	1	0.0811916	0.158838
	2	14504.5	23927.3	0.606188		1.14851
	3	11857.2	26984	0.439415		0.832532
HFD+ABX+Rg1	4	17519.2	25425.3	0.689046	0.689039	1.30549	1.30548		0.163739
	5	19805.2	25540	0.775458		1.46921
	6	16402.5	27219	0.602613		1.14173
		UQCRC2	β-actin
HFD+ABX	1	22481.3	20634.4	1.08951	0.946788	1.15074	1	0.596193	0.181184
	2	23793	23927.3	0.994385		1.05027
	3	20412.6	26984	0.756472		0.798988
HFD+ABX+Rg1	4	26090.5	25425.3	1.02616	0.849341	1.08383	0.897076		0.251695
	5	24097.5	25540	0.943522		0.996551
	6	15741.9	27219	0.578342		0.610846
		SDHB	β-actin
HFD+ABX	1	22267.7	20634.4	1.07915	0.939038	1.14921	1	0.432808	0.129721
	2	21048.2	23927.3	0.87967		0.936778
	3	23160.1	26984	0.858292		0.914011
HFD+ABX+Rg1	4	18243.1	25425.3	0.717514	0.853243	0.764095	0.908635		0.127149
	5	22989.8	25540	0.900151		0.958588
	6	25642	27219	0.942063		1.00322
