# Supplementary material for: Ginsenoside Rg1 activates brown adipose tissue to counteract obesity in high-fat diet-fed mice by regulating gut microbes and bile acid composition
Source: Royal Society of Chemistry journal article supplement (doi:10.1039/d2fo03142f), 2023-01-01
Supplement: d2fo03142f8.pdf [file d2fo03142f8.pdf]

## Supporting Information

Fig.S1

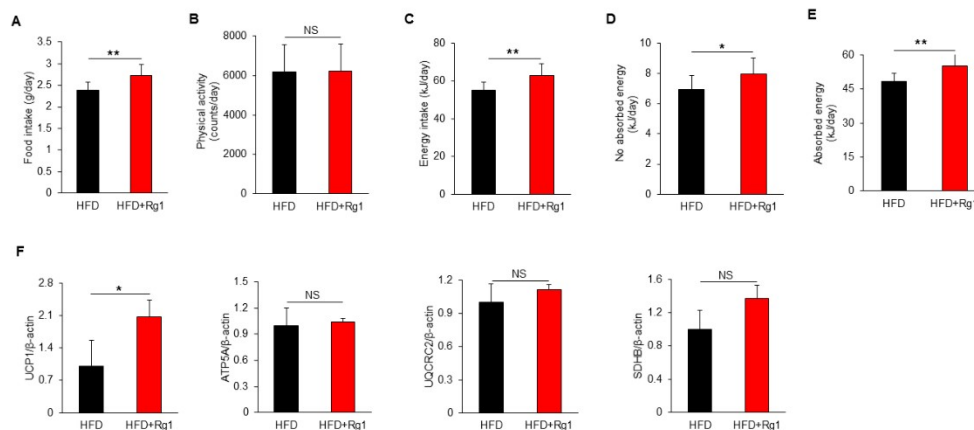

**Figure S1. Ginsenoside Rg1 increased energy intake and UCP1 protein expression in HFD-induced C57BL/6 mice (n=9–10).** (A) Food intake. (B) Physical activity. (C) Energy intake. (D) No absorbed energy. (E) Absorbed energy. (F) The protein amounts of UCP1, ATP5A, UQCRC2, SDHB in BAT. Results are expressed as mean  $\pm$  SD. \*  $p < 0.05$  and \*\*  $p < 0.01$ . NS, not statistically significant.

Fig.S2

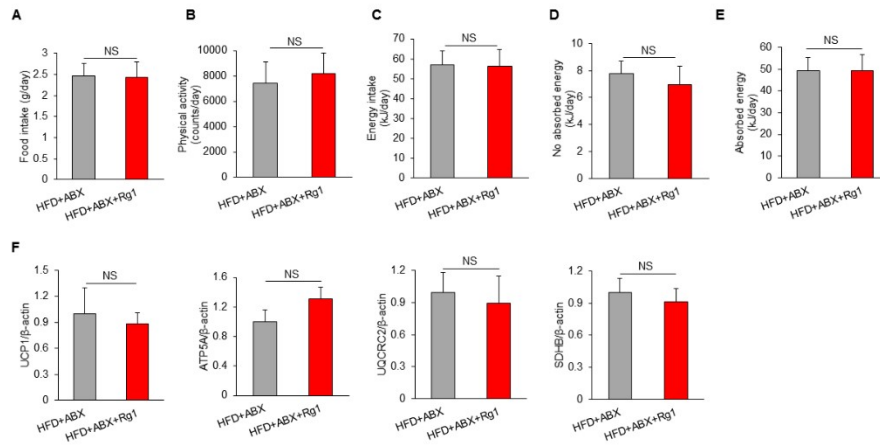

**Figure S2. ABX inhibit the effect of ginsenoside Rg1 on increasing energy intake and UCP1 protein expression in HFD-induced C57BL/6 mice (n=10).** (A) Food intake. (B) Physical activity. (C) Energy intake. (D) No absorbed energy. (E) Absorbed energy. (F) The protein amounts of UCP1, ATP5A, UQCRC2, SDHB in BAT. Results are expressed as mean  $\pm$  SD. NS, not statistically significant.
