# Supplementary figures and images for: Ginsenoside Rg1 activates brown adipose tissue to counteract obesity in high-fat diet-fed mice by regulating gut microbes and bile acid composition
Source: Royal Society of Chemistry journal article supplement (doi:10.1039/d2fo03142f), 2023-01-01

Fig.S1

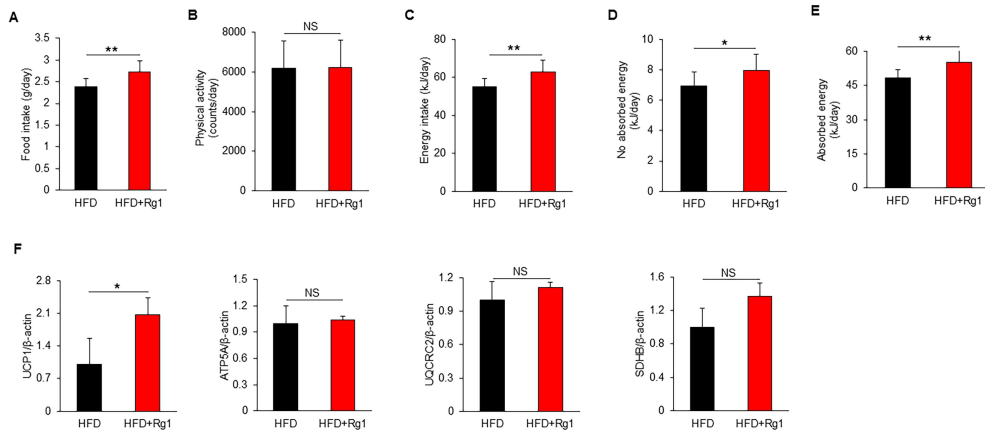

Supplement: d2fo03142f6.pdf [file d2fo03142f6.pdf]

Fig.S2

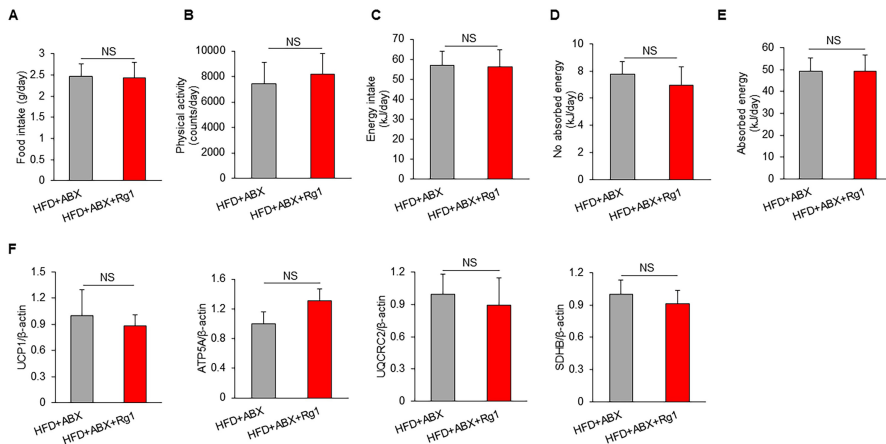

Supplement: d2fo03142f7.pdf [file d2fo03142f7.pdf]
